# Supplementary material for: Integrated Value of Influence: An Integrative Method for the Identification of the Most Influential Nodes within Networks
Source: PubMed Central journal article supplement — Patterns (N Y). 2020 Jun 22;1(5):100052. doi: 10.1016/j.patter.2020.100052 (PMC7660386; doi:10.1016/j.patter.2020.100052), 2020-06-22
Supplement: mmc1.pdf [file mmc1.pdf]

**PATTER, Volume 1**

**Supplemental Information**

**Integrated Value of Influence: An Integrative  
Method for the Identification of the Most  
Influential Nodes within Networks**

**Abbas Salavaty, Mirana Ramialison, and Peter D. Currie**

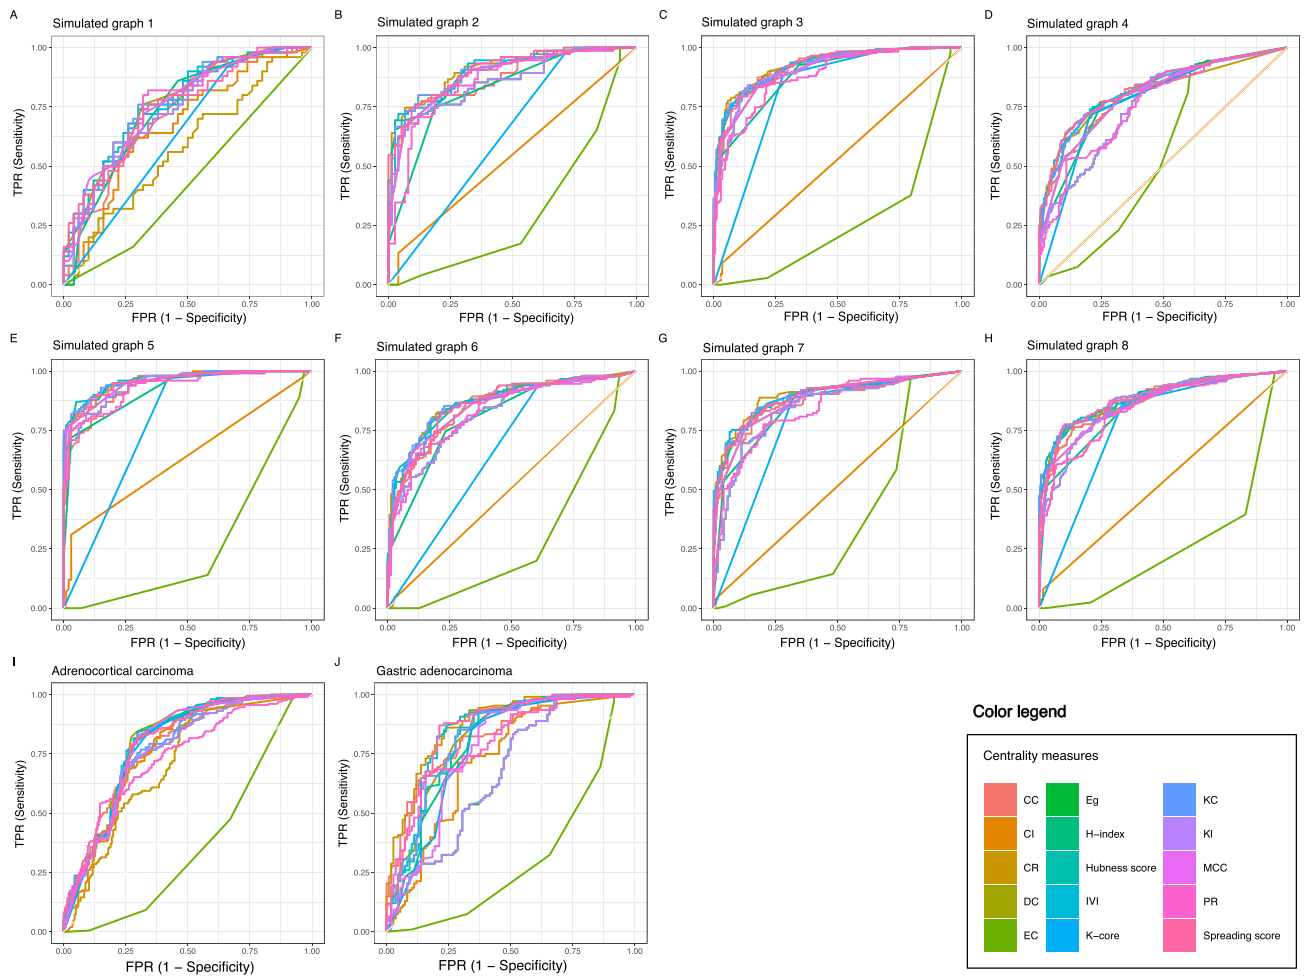

**Figure S1. Performance of IVI in comparison with 14 other current methods in practice. Related to Figure 6.**

**A-J.** The receiver operating characteristics (ROC) plots of the performance of 15 different methods in identification of true influential nodes across 10 networks including eight randomly simulated (A-H) and two biological ones (I and J). The biological networks include a protein-protein interaction network of adrenocortical carcinoma (I) and a miRNA co-expression network of gastric adenocarcinoma (J). The extended form of abbreviations used in the figure are as follows; TPR: true positive rate, FPR: false positive rate, IVI: integrated value of influence, DC: degree centrality, KI: Kleinberg's hub centrality score, CR: ClusterRank, Cl: collective influence, PR: PageRank, CC: closeness centrality, Eg: eigenvector centrality, KC: Katz centrality, EC: Eccentricity centrality, MCC: maximal clique centrality.

**Table S3.** A table of all 10 networks including their source and basic characteristics used and investigated in this study for the evaluation of the performance of IVI in comparison with other methods.

| <b>Network name</b>                           | <b>Citation</b> | <b># nodes</b> | <b># edged</b> |
|-----------------------------------------------|-----------------|----------------|----------------|
| PPI network of adrenocortical carcinoma       | PMID: 27422560  | 413            | 6605           |
| miRNA co-expression in gastric adenocarcinoma | PMID: 30886771  | 216            | 948            |
| Simulated graph 1                             | This paper      | 100            | 500            |
| Simulated graph 2                             | This paper      | 150            | 235            |
| Simulated graph 3                             | This paper      | 350            | 645            |
| Simulated graph 4                             | This paper      | 400            | 379            |
| Simulated graph 5                             | This paper      | 200            | 405            |
| Simulated graph 6                             | This paper      | 300            | 465            |
| Simulated graph 7                             | This paper      | 250            | 307            |
| Simulated graph 8                             | This paper      | 500            | 935            |

**Table S4.** A table of key resources including the software packages used for statistical assessments and data visualization.

| Reagent or Resource            | Source                           | Identifier                                                                                                  |
|--------------------------------|----------------------------------|-------------------------------------------------------------------------------------------------------------|
| <b>Software and Algorithms</b> |                                  |                                                                                                             |
| R statistical software         | R Core Team                      | <a href="https://www.r-project.org">https://www.r-project.org</a>                                           |
| igraph R package               | Csardi & Nepusz, (2006)          | <a href="https://cran.r-project.org/package=igraph">https://cran.r-project.org/package=igraph</a>           |
| CANOVA R package               | Wang et al, (2015)               | <a href="https://github.com/liyistat/canova">https://github.com/liyistat/canova</a>                         |
| Hmisc R package                | Harrell Jr et al.                | <a href="https://CRAN.R-project.org/package=Hmisc">https://CRAN.R-project.org/package=Hmisc</a>             |
| NNS R package                  | Viola                            | <a href="https://cran.r-project.org/package=NNS">https://cran.r-project.org/package=NNS</a>                 |
| minerva R package              | Albanese et al (2012)            | <a href="https://cran.r-project.org/package=minerva">https://cran.r-project.org/package=minerva</a>         |
| centiserve                     | Jalili (2017)                    | <a href="https://cran.r-project.org/package=centiserve">https://cran.r-project.org/package=centiserve</a>   |
| Rmisc R package                | Hope                             | <a href="https://cran.r-project.org/package=Rmisc">https://cran.r-project.org/package=Rmisc</a>             |
| mgcv R package                 | Wood et al, (2016)               | <a href="https://CRAN.R-project.org/package=mgcv">https://CRAN.R-project.org/package=mgcv</a>               |
| influential R package          | This paper                       | <a href="https://CRAN.R-project.org/package=influential">https://CRAN.R-project.org/package=influential</a> |
| Cytoscape v3.7.1               | Shannon et al, 2003              | <a href="http://www.cytoscape.org">http://www.cytoscape.org</a>                                             |
| cytoHubba Cytoscape plugin     | Chin et al, (2014)               | <a href="http://apps.cytoscape.org/apps/cytohubba">http://apps.cytoscape.org/apps/cytohubba</a>             |
| ggplot2 R package              | Wickham H, (2016)                | <a href="https://cran.r-project.org/package=ggplot2">https://cran.r-project.org/package=ggplot2</a>         |
| plotROC R package              | Sachs (2017)                     | <a href="https://cran.r-project.org/package=plotROC">https://cran.r-project.org/package=plotROC</a>         |
| <b>Other</b>                   |                                  |                                                                                                             |
| 196 real-world networks        | Index of Complex Networks (ICON) | <a href="https://icon.colorado.edu">https://icon.colorado.edu</a>                                           |
